# Supplementary material for: Machine Learning Identifies a Signature of Nine Exosomal RNAs That Predicts Hepatocellular Carcinoma
Source: MDPI journal article supplement (doi:10.3390/cancers15143749), 2023-07-24
Supplement: s1 [file s1]

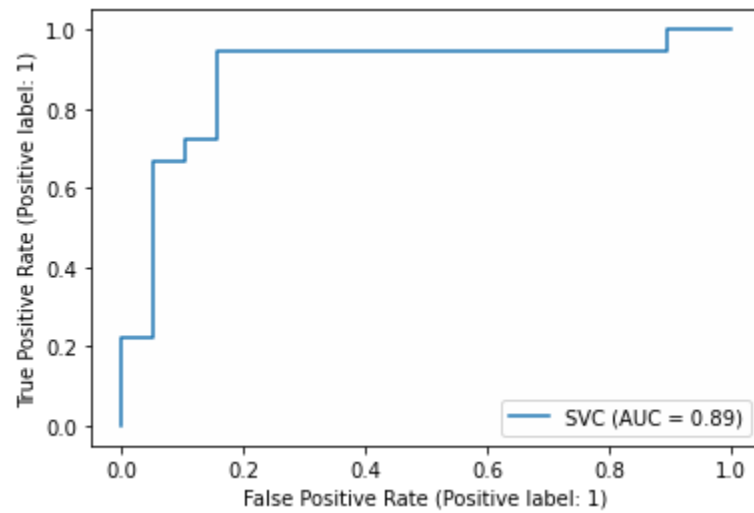

**Figure S1.** Predictive performance of nine machine learning selected exosomal RNAs in validation set.

**Table S1.** Differential expression of nine machine learning selected exosomal RNAs signatures between HCC patients and healthy individuals.

| Exosomal RNAs                            | Mean Expression<br>Log <sub>2</sub> (TPM+1) |         | Wilcoxon Rank Sum test |          |            |
|------------------------------------------|---------------------------------------------|---------|------------------------|----------|------------|
|                                          | HCC                                         | Healthy | Fold Change            | P value  | Adjusted P |
| MTRNRL8                                  | 13.59                                       | 12.57   | 2.02                   | 1.81E-06 | 1.76E-04   |
| FTL                                      | 13.88                                       | 13.83   | 1.04                   | 1.57E-01 | 3.50E-01   |
| PPBP                                     | 13.8                                        | 13.94   | -1.1                   | 6.61E-01 | 8.10E-01   |
| TMSB4X                                   | 13.48                                       | 13.59   | -1.08                  | 1.96E-01 | 4.01E-01   |
| S100A11                                  | 11.87                                       | 11.29   | 1.49                   | 1.49E-06 | 1.50E-04   |
| S100A9                                   | 12.21                                       | 11.53   | 1.6                    | 3.78E-08 | 7.00E-06   |
| ACTB                                     | 14.19                                       | 14.11   | 1.06                   | 2.00E-01 | 4.04E-01   |
| GSE1 (parental gene of exo_circ_22106)   | 6.73                                        | 6.95    | -1.17                  | 7.21E-04 | 1.17E-02   |
| TXLNGY (parental gene of exo_circ_79050) | N/A                                         | N/A     | N/A                    | N/A      | N/A        |
| exo_circ_22106                           | 12.64                                       | 12.79   | -1.11                  | 7.85E-02 | 2.30E-01   |
| exo_circ_79050                           | 8.05                                        | 4.67    | 10.46                  | 2.05E-08 | 4.00E-06   |

N/A: Data is not available; Red box: Exosomal RNAs that passed the criteria of absolute fold change threshold of 1.2 and adjusted  $p < 0.05$ .

**Table S2.** Top nine exosomal RNAs that are significantly differentially expressed with the highest absolute fold change between HCC patients and healthy individuals.

| Exosomal RNAs  | Mean Expression<br>Log2(TPM+1) |         | Wilcoxon Rank Sum test |          |            |
|----------------|--------------------------------|---------|------------------------|----------|------------|
|                | HCC                            | Healthy | Fold Change            | P value  | Adjusted P |
| exo_circ_79050 | 8.05                           | 4.67    | 10.46                  | 2.05E-08 | 4.02E-06   |
| exo_circ_79066 | 6.98                           | 3.93    | 8.31                   | 1.19E-06 | 1.26E-04   |
| exo_circ_71478 | 6.81                           | 3.96    | 7.18                   | 6.49E-06 | 4.53E-04   |
| exo_circ_11335 | 6.42                           | 3.6     | 7.08                   | 1.95E-06 | 1.85E-04   |
| exo_circ_68977 | 6.77                           | 3.98    | 6.92                   | 5.59E-06 | 4.13E-04   |
| exo_circ_38752 | 6.61                           | 3.87    | 6.69                   | 7.01E-05 | 2.45E-03   |
| ORM1           | 3.78                           | 1.07    | 6.52                   | 2.11E-18 | 6.68E-15   |
| exo_circ_19955 | 6.81                           | 4.27    | 5.8                    | 4.23E-05 | 1.71E-03   |
| exo_circ_71780 | 3.75                           | 1.23    | 5.74                   | 4.31E-07 | 5.26E-05   |

**Table S3.** Predictive performance of top nine significantly differentially expressed exosomal RNAs in Predicting HCC patients vs. healthy individuals in unseen test set.

|             | SVM   | MLP   | Random Forest | Logistic Regression | K-nearest neighbour | Gaussian Naïve Bayes |
|-------------|-------|-------|---------------|---------------------|---------------------|----------------------|
| Accuracy    | 0.587 | 0.652 | 0.783         | 0.609               | 0.696               | 0.587                |
| Precision   | 0.556 | 0.600 | 0.750         | 0.567               | 0.654               | 0.548                |
| Recall      | 0.618 | 0.818 | 0.818         | 0.773               | 0.773               | 0.773                |
| Specificity | 0.500 | 0.500 | 0.750         | 0.458               | 0.625               | 0.417                |
| FPR         | 0.500 | 0.500 | 0.250         | 0.542               | 0.375               | 0.583                |
| F1-Score    | 0.612 | 0.692 | 0.783         | 0.654               | 0.708               | 0.642                |
| AUC         | 0.740 | 0.710 | 0.850         | 0.750               | 0.730               | 0.620                |

**Table S4.** Differential expression of the nine exosomal RNA signatures between tumour and adjacent non-tumour samples in TCGA data.

| Exosomal RNAs                            | Mean Expression Log2(TPM+1) |                     | Paired T-test |          |            |
|------------------------------------------|-----------------------------|---------------------|---------------|----------|------------|
|                                          | HCC Tumour                  | Adjacent non-tumour | Fold Change   | P value  | Adjusted P |
| MTRNRL8                                  | 1.54                        | 1.84                | -1.17         | 3.99E-03 | 7.31E-03   |
| FTL                                      | 31919.76                    | 15835.75            | 1.4           | 1.11E-02 | 1.82E-02   |
| PPBP                                     | 0.37                        | 0.93                | -1.42         | 1.31E-05 | 4.06E-05   |
| TMSB4X                                   | 731.6                       | 502.14              | 1.24          | 8.44E-02 | 1.11E-01   |
| S100A11                                  | 351.79                      | 98.25               | 1.91          | 1.09E-03 | 2.27E-03   |
| S100A9                                   | 59.81                       | 59.53               | -1.78         | 2.73E-03 | 5.19E-03   |
| ACTB                                     | 1710.52                     | 1041.64             | 1.58          | 1.49E-07 | 6.69E-07   |
| GSE1 (parental gene of exo_circ_22106)   | 8.49                        | 5.73                | 1.34          | 9.42E-04 | 1.99E-03   |
| TXLNGY (parental gene of exo_circ_79050) | 1.67                        | 0.93                | 1.2           | 0.0113   | 0.0186     |
| exo_circ_22106                           | N/A                         | N/A                 | N/A           | N/A      | N/A        |
| exo_circ_79050                           | N/A                         | N/A                 | N/A           | N/A      | N/A        |

N/A: Data is not available.

**Table S5.** Existing literature of nine exosomal RNA signatures in HCC.

| Features | Pubmed ID | Association<br>with HCC | Validated by<br>experiment | Observation                                                     | Citation                                                                                                                                                                                                                                                                                                                                                                                                                                                                                                |
|----------|-----------|-------------------------|----------------------------|-----------------------------------------------------------------|---------------------------------------------------------------------------------------------------------------------------------------------------------------------------------------------------------------------------------------------------------------------------------------------------------------------------------------------------------------------------------------------------------------------------------------------------------------------------------------------------------|
| TMSB4X   | 24299315  | Y                       | Y                          | Upregulated in HCC                                              | Yang, L., Ji, J., Chen, Z., Wang, H. and Li, J. (2014). Transcriptome profiling of malignant transformed rat hepatic stem-like cells by aflatoxin B1. <i>Neoplasia</i> , 61(2), 193–204. <a href="https://doi.org/10.4149/neo_2014_025">https://doi.org/10.4149/neo_2014_025</a>                                                                                                                                                                                                                        |
|          | 29568350  | Y                       | Y                          | Promotes angiogenesis                                           | Lee, H. Y., Chen, C. K., Ho, C. M., Lee, S. S., Chang, C. Y., Chen, K. J. and Jou, Y. S. (2018). EIF3C-enhanced exosome secretion promotes angiogenesis and tumorigenesis of human hepatocellular carcinoma. <i>Oncotarget</i> , 9(17), 13193–13205. <a href="https://doi.org/10.18632/oncotarget.24149">https://doi.org/10.18632/oncotarget.24149</a>                                                                                                                                                  |
|          | 31703598  | Y                       | Y                          | Promotes metastasis                                             | Dong, Y., Zheng, Q., Wang, Z., Lin, X., You, Y., Wu, S., Wang, Y., Hu, C., Xie, X., Chen, J., Gao, D., Zhao, Y., Wu, W., Liu, Y., Ren, Z., Chen, R. and Cui, J. (2019). Higher matrix stiffness as an independent initiator triggers epithelial-mesenchymal transition and facilitates HCC metastasis. <i>Journal of hematology &amp; oncology</i> , 12(1), 112. <a href="https://doi.org/10.1186/s13045-019-0795-5">https://doi.org/10.1186/s13045-019-0795-5</a>                                      |
| S100A11  | 31919231  | Y                       | Y                          | Promotes inflammation                                           | Sobolewski, C., Abegg, D., Berthou, F., Dolicka, D., Calo, N., Sempoux, C., Fournier, M., Maeder, C., Ay, A. S., Clavien, P. A., Humar, B., Dufour, J. F., Adibekian, A. and Foti, M. (2020). S100A11/ANXA2 belongs to a tumour suppressor/oncogene network deregulated early with steatosis and involved in inflammation and hepatocellular carcinoma development. <i>Gut</i> , 69(10), 1841–1854. <a href="https://doi.org/10.1136/gutjnl-2019-319019">https://doi.org/10.1136/gutjnl-2019-319019</a> |
|          | 33815482  | Y                       | N                          | Upregulation associated with poor survival<br>Immune regulation | Zheng, S., Liu, L., Xue, T., Jing, C., Xu, X., Wu, Y., Wang, M., Xie, X. and Zhang, B. (2021). Comprehensive Analysis of the Prognosis and Correlations With Immune Infiltration of S100 Protein Family Members in Hepatocellular Carcinoma. <i>Frontiers in genetics</i> , 12, 648156. <a href="https://doi.org/10.3389/fgene.2021.648156">https://doi.org/10.3389/fgene.2021.648156</a>                                                                                                               |
|          | 33546025  | Y                       | N                          | Upregulation associated with poor survival                      | Zhang, C., Yao, R., Chen, J., Zou, Q. and Zeng, L. (2021). S100 family members: potential therapeutic target in patients with hepatocellular carcinoma: A STROBE study. <i>Medicine</i> , 100(3), e24135. <a href="https://doi.org/10.1097/MD.0000000000002413">https://doi.org/10.1097/MD.0000000000002413</a>                                                                                                                                                                                         |

|        |          |   |   |                                                                 |                                                                                                                                                                                                                                                                                                                                                                                                                                                                 |
|--------|----------|---|---|-----------------------------------------------------------------|-----------------------------------------------------------------------------------------------------------------------------------------------------------------------------------------------------------------------------------------------------------------------------------------------------------------------------------------------------------------------------------------------------------------------------------------------------------------|
| S100A9 | 33815482 | Y | N | Downregulated in tumour                                         | Zheng, S., Liu, L., Xue, T., Jing, C., Xu, X., Wu, Y., Wang, M., Xie, X. and Zhang, B. (2021). Comprehensive Analysis of the Prognosis and Correlations With Immune Infiltration of S100 Protein Family Members in Hepatocellular Carcinoma. <i>Frontiers in genetics</i> , 12, 648156.<br><a href="https://doi.org/10.3389/fgene.2021.648156">https://doi.org/10.3389/fgene.2021.648156</a>                                                                    |
|        | 33546025 | Y | N | Upregulation associated with poor survival                      | Zhang, C., Yao, R., Chen, J., Zou, Q. and Zeng, L. (2021). S100 family members: potential therapeutic target in patients with hepatocellular carcinoma: A STROBE study. <i>Medicine</i> , 100(3), e24135.<br><a href="https://doi.org/10.1097/MD.00000000000024135">https://doi.org/10.1097/MD.00000000000024135</a>                                                                                                                                            |
|        | 35397536 | Y | Y | Upregulation associated with poor survival<br>Immune regulation | Wang, Y., Yang, Y., Zhao, Z., Sun, H., Luo, D., Huttad, L., Zhang, B. and Han, B. (2022). A new nomogram model for prognosis of hepatocellular carcinoma based on novel gene signature that regulates cross-talk between immune and tumor cells. <i>BMC cancer</i> , 22(1), 379.<br><a href="https://doi.org/10.1186/s12885-022-09465-9">https://doi.org/10.1186/s12885-022-09465-9</a>                                                                         |
|        | 35560794 | Y | N | Immune regulation                                               | Chen, J., Wang, H., Zhou, L., Liu, Z., Chen, H. and Tan, X. (2022). A necroptosis-related gene signature for predicting prognosis, immune landscape and drug sensitivity in hepatocellular carcinoma. <i>Cancer medicine</i> , 10.1002/cam4.4812.<br>Advance online publication.<br><a href="https://doi.org/10.1002/cam4.4812">https://doi.org/10.1002/cam4.4812</a>                                                                                           |
|        | 35693827 | Y | N | Prognostic marker                                               | Wang, T., Dai, L., Shen, S., Yang, Y., Yang, M., Yang, X., Qiu, Y., & Wang, W. (2022). Comprehensive Molecular Analyses of a Macrophage-Related Gene Signature With Regard to Prognosis, Immune Features and Biomarkers for Immunotherapy in Hepatocellular Carcinoma Based on WGCNA and the LASSO Algorithm. <i>Frontiers in immunology</i> , 13, 843408.<br><a href="https://doi.org/10.3389/fimmu.2022.843408">https://doi.org/10.3389/fimmu.2022.843408</a> |
|        | 35992798 | Y | N | Prognostic marker<br>Immune regulation                          | Yuan, J., Wang, Y., Wang, X., Zhang, W., Ding, R., Yue, S. and Li, X. (2022). Construction and experimental verification of user-friendly molecular subtypes mediated by immune-associated genes in hepatocellular carcinoma. <i>Frontiers in oncology</i> , 12, 924059.<br><a href="https://doi.org/10.3389/fonc.2022.924059">https://doi.org/10.3389/fonc.2022.924059</a>                                                                                     |

|      |          |   |   |                                                                 |                                                                                                                                                                                                                                                                                                                                                                                                                                                                                                                              |
|------|----------|---|---|-----------------------------------------------------------------|------------------------------------------------------------------------------------------------------------------------------------------------------------------------------------------------------------------------------------------------------------------------------------------------------------------------------------------------------------------------------------------------------------------------------------------------------------------------------------------------------------------------------|
|      | 36041055 | Y | Y | Upregulation associated with recurrence Promotes growth and EMT | Zhong, C., Niu, Y., Liu, W., Yuan, Y., Li, K., Shi, Y., Qiu, Z., Li, K., Lin, Z., Huang, Z., Zuo, D., Yang, Z., Liao, Y., Zhang, Y., Wang, C., Qiu, J., He, W., Yuan, Y. and Li, B. (2022). S100A9 Derived from Chemoembolization-Induced Hypoxia Governs Mitochondrial Function in Hepatocellular Carcinoma Progression. <i>Advanced science (Weinheim, Baden-Wurttemberg, Germany)</i> , e2202206. Advance online publication. <a href="https://doi.org/10.1002/advs.202202206">https://doi.org/10.1002/advs.202202206</a> |
|      | 36032071 | Y | N | Prognostic marker Immune regulation                             | Guo, C., Tang, Y., Yang, Z., Li, G. and Zhang, Y. (2022). Hallmark-guided subtypes of hepatocellular carcinoma for the identification of immune-related gene classifiers in the prediction of prognosis, treatment efficacy and drug candidates. <i>Frontiers in immunology</i> , 13, 958161. <a href="https://doi.org/10.3389/fimmu.2022.958161">https://doi.org/10.3389/fimmu.2022.958161</a>                                                                                                                              |
| PPBP | 31346321 | Y | N | Diagnostic marker                                               | Ding, B., Lou, W., Liu, J., Li, R., Chen, J. and Fan, W. (2019). In silico analysis excavates potential biomarkers by constructing miRNA-mRNA networks between non-cirrhotic HCC and cirrhotic HCC. <i>Cancer cell international</i> , 19, 186. <a href="https://doi.org/10.1186/s12935-019-0901-3">https://doi.org/10.1186/s12935-019-0901-3</a>                                                                                                                                                                            |
|      | 31432149 | Y | N | Prognostic marker                                               | Wang, X., Zhou, X., Liu, J., Liu, Z., Zhang, L., Gong, Y., Huang, J., Yu, L., Wang, Q., Yang, C., Liao, X., Yu, T., Han, C., Zhu, G., Ye, X. and Peng, T. (2019). Genome-wide investigation of the clinical implications and molecular mechanism of long noncoding RNA LINC00668 and protein-coding genes in hepatocellular carcinoma. <i>International journal of oncology</i> , 55(4), 860–878. <a href="https://doi.org/10.3892/ijo.2019.4858">https://doi.org/10.3892/ijo.2019.4858</a>                                  |
| FTL  | 32577166 | Y | N | Diagnostic marker                                               | Sayeed, A., Dalvano, B. E., Kaplan, D. E., Viswanathan, U., Kulp, J., Janneh, A. H., Hwang, L. Y., Ertel, A., Doria, C. and Block, T. (2020). Profiling the circulating mRNA transcriptome in human liver disease. <i>Oncotarget</i> , 11(23), 2216–2232. <a href="https://doi.org/10.18632/oncotarget.27617">https://doi.org/10.18632/oncotarget.27617</a>                                                                                                                                                                  |
|      | 34790741 | Y | Y | Promotes growth                                                 | He, Y., Fang, D., Liang, T., Pang, H., Nong, Y., Tang, L., Yang, Z., Lu, C., Han, X., Zhao, S., Mo, S., Meng, Y., Han, C. and Peng, T. (2021). Atractylodin may induce ferroptosis of human hepatocellular carcinoma cells. <i>Annals of translational medicine</i> , 9(20), 1535. <a href="https://doi.org/10.21037/atm-21-4386">https://doi.org/10.21037/atm-21-4386</a>                                                                                                                                                   |

|                         |          |   |   |                                                      |                                                                                                                                                                                                                                                                                                                                                                                                                     |
|-------------------------|----------|---|---|------------------------------------------------------|---------------------------------------------------------------------------------------------------------------------------------------------------------------------------------------------------------------------------------------------------------------------------------------------------------------------------------------------------------------------------------------------------------------------|
|                         |          |   |   |                                                      | Hu, Z. W., Chen, L., Ma, R. Q., Wei, F. Q., Wen, Y. H., Zeng, X. L., Sun, W. and Wen, W.<br>P. (2021). Comprehensive analysis of ferritin subunits expression and positive correlations with tumor-associated macrophages and T regulatory cells infiltration in most solid tumors. <i>Aging</i> , 13(8), 11491–11506.<br><a href="https://doi.org/10.18632/aging.202841">https://doi.org/10.18632/aging.202841</a> |
|                         | 33864445 | Y | N | Upregulation associated with poor survival           |                                                                                                                                                                                                                                                                                                                                                                                                                     |
|                         | 35378780 | N | N | Biomarker of Liver Cancer                            | Ren, P., Wang, K., Ma, J., Cao, X., Zhao, J., Zhao, C., Guo, Y. and Ye, H. (2022). Autoantibody Against Ferritin Light Chain is a Serum Biomarker for the Detection of Liver Cirrhosis but Not Liver Cancer. <i>Journal of hepatocellular carcinoma</i> , 9, 221–232.<br><a href="https://doi.org/10.2147/JHC.S352057">https://doi.org/10.2147/JHC.S352057</a>                                                      |
|                         | 35651950 | Y | Y | Promotes growth. Prognostic marker Immune regulation | Ke, S., Wang, C., Su, Z., Lin, S. and Wu, G. (2022). Integrated Analysis Reveals Critical Ferroptosis Regulators and FTL Contribute to Cancer Progression in Hepatocellular Carcinoma. <i>Frontiers in genetics</i> , 13, 897683.<br><a href="https://doi.org/10.3389/fgene.2022.897683">https://doi.org/10.3389/fgene.2022.897683</a>                                                                              |
| ACTB                    | 31846694 | Y | Y | Promotes metastasis                                  | Li, Y., Ma, H., Shi, C., Feng, F. and Yang, L. (2020). Mutant ACTB mRNA 3'-UTR promotes hepatocellular carcinoma development by regulating miR-1 and miR-29a. <i>Cellular signalling</i> , 67, 109479.<br><a href="https://doi.org/10.1016/j.cellsig.2019.109479">https://doi.org/10.1016/j.cellsig.2019.109479</a>                                                                                                 |
| exo_circ_22106/circGSE1 | 35396771 | Y | Y | Immune regulation                                    | Huang, M., Huang, X. and Huang, N. (2022). Exosomal circGSE1 promotes immune escape of hepatocellular carcinoma by inducing the expansion of regulatory T cells. <i>Cancer science</i> , 113(6), 1968–1983.<br><a href="https://doi.org/10.1111/cas.15365">https://doi.org/10.1111/cas.15365</a>                                                                                                                    |

Y: Yes; N: No.
